# Supplementary material for: Brain CHID1 Expression Correlates with NRGN and CALB1 in Healthy Subjects and AD Patients
Source: MDPI journal article supplement (doi:10.3390/cells10040882), 2021-04-13
Supplement: s1 [file s1]

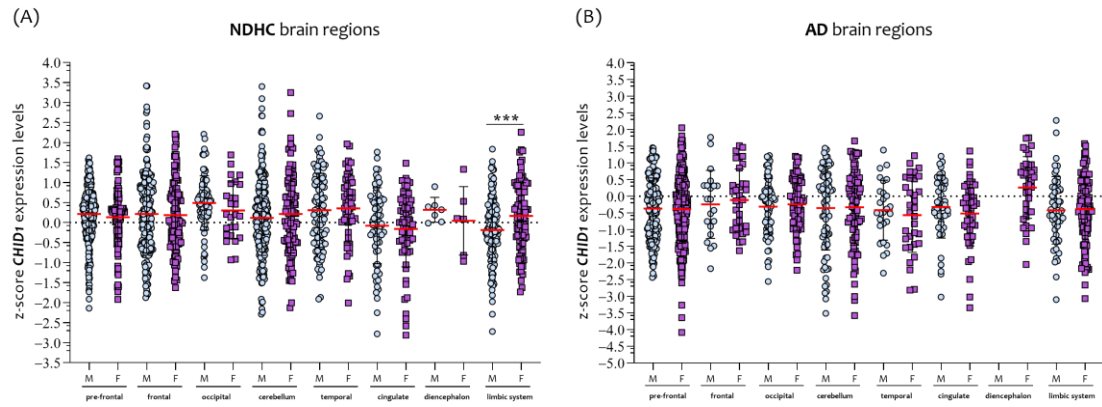

**Figure S1.** Significant difference in NDHC subjects' limbic system region (males had significantly lower levels than females,  $p < 0.0001$ ) (Figure S1A). No significant difference between the sexes was observed in the different brain regions of AD patients (Figure S1B).
